# Supplementary material for: Multiple Lines of Evidences Reveal Mechanisms Underpinning Mercury Resistance and Volatilization by Stenotrophomonas sp. MA5 Isolated from the Savannah River Site (SRS), USA
Source: PubMed Central journal article supplement (PMC6523443; doi:10.3390/cells8040309), 2019-04-03
Supplement: cells-08-00309-s001.pdf [file cells-08-00309-s001.pdf]

## Supplementary Materials

# Multiple Lines of Evidences Reveal Mechanisms Underpinning Mercury Resistance and Volatilization by *Stenotrophomonas* sp. MA5 Isolated from the Savannah River Site (SRS), USA

**Table S1: List of primers and probes used for qRT-PCR analysis**

| Target gene | Forward primer             | Reverse primer             | Probe                         |
|-------------|----------------------------|----------------------------|-------------------------------|
| 16s         | CTCGGAATTACTGGGCGT<br>AAAG | CGCTACCCTCTACCACATT<br>CTA | AACGGACTTAAACGACCAC<br>CTACGC |
| <i>merA</i> | CCAAGTACGAAGGCATC<br>CTG   | TCGTTCAAACGGACGGTAA<br>G   | ACAACGGTGATGGCCGGAT<br>TACC   |
| <i>merD</i> | GGTGAGCGTGCATATCGT         | TCATCGAACAAGCCGTAGC        | TACCTGCTGCGCGGATTGCT          |
| <i>merT</i> | CAAACCGGGTGAGGTCTG         | TGGCATGACGTAGGGAAAT<br>C   | CCCAAGTGCGAGCTACTTAC<br>AAGCT |
| <i>merE</i> | CGTCCGAGACGCACAAA          | CACGACAGCGAGGATGG          | ACTGGCTGTGCTGACTTGCC          |
| <i>merR</i> | CGTGCTGTCTGAGTTGGT         | CTAAGGCATAGCCGAACCT<br>G   | AAGCTTGCTCCACCCTGTAG<br>TGAC  |
| <i>merP</i> | AGTTGACGTGACTTTCGA<br>GAC  | CTTGACGCTGGACGGATAG        | ACCTTCGACGATGCCAAGA<br>CCAG   |

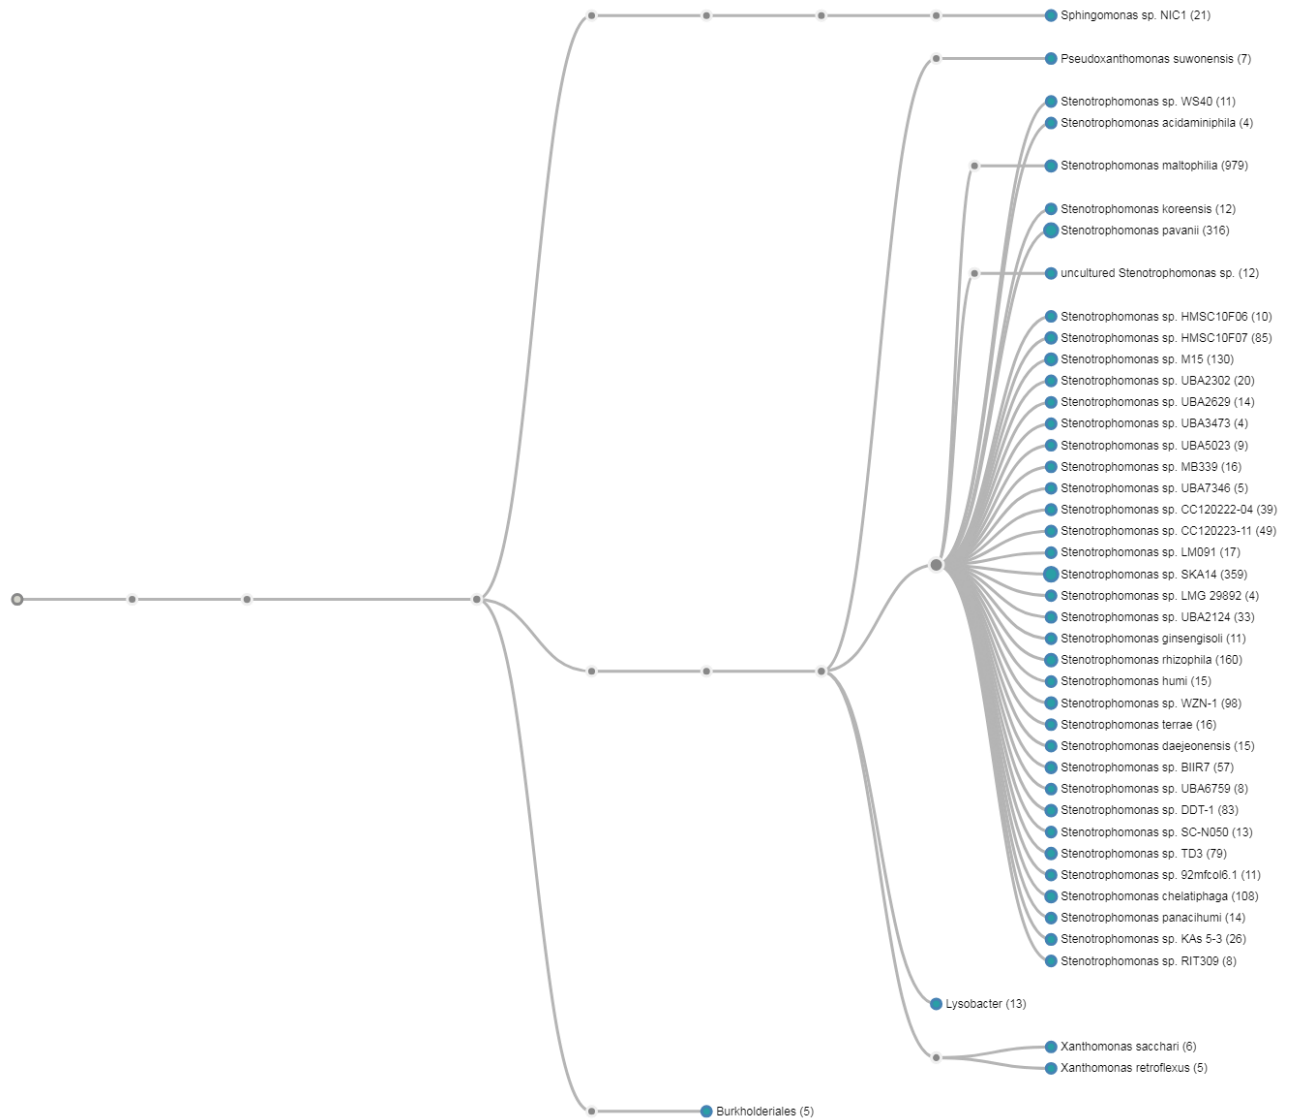

**Figure S1:** Whole genome sequence-based phylogenetic tree of isolated strain *Stenotrophomonas* sp. strain MA5. The highest taxonomic affiliation of strain was found with *Stenotrophomonas maltophilia* based on highest number of whole genome sequence reads (979; shown in parenthesis). Displayed nodes are those with at least 4 reads (<1% classified reads). This tree was generated by using one codex database.
